# Supplementary material
Source: PubMed Central journal article supplement (PMC4407707)
Supplement: supp_114.062836_Supplemental_62836.pdf [file supp_114.062836_Supplemental_62836.pdf]

DMD # 62836

**GW4064, an agonist of farnesoid X receptor (FXR), represses CYP3A4 expression in human hepatocytes by inducing small heterodimer partner (SHP) expression**

Shu Zhang, Xian Pan, and Hyunyoung Jeong

*Drug Metabolism and Disposition*

**Table. S1. Sequences of oligonucleotides used in qRT-PCR**

| <b>Gene</b>                   | <b>Forward primer</b> | <b>Reverse primer</b> |
|-------------------------------|-----------------------|-----------------------|
| <i>SHP (NROB2)</i>            | TCAAGTCCATTCGACCAGC   | AAGAAGGCCAGCGATGTCAA  |
| <i>PXR</i>                    | GATGATCATGTCCGACGAG   | GACTTCAGAGTAATGGCGA   |
| <i>MDR3</i>                   | AATTTATCCTGCCAATCGGA  | GCATCAGCAGCAAACAAAAA  |
| <i>FASN</i>                   | ACAGGGACAACCTGGAGTTC  | TGTGGTCCCACCTTGATGAGT |
| <i>SREBF1</i>                 | TTCTCACCTCCAGCTCTGT   | GGTCCTGGAAGTCAGTCCAT  |
| <i>TNF<math>\alpha</math></i> | GCCAGAGGGCTGATTAGAGA  | TCAGCCTCTTCTCCTTCCTG  |
